# Supplementary material for: Molecular Characteristics and Quantitative Proteomic Analysis of Klebsiella pneumoniae Strains with Carbapenem and Colistin Resistance
Source: MDPI journal article supplement (doi:10.3390/antibiotics11101341), 2022-09-30
Supplement: s1 [file s1]

**Table S10: The sequences of primers used in this study.**

| Primer | Nucleotide Sequence (5' to 3') | Target gene              | Fragment (bp) | References |
|--------|--------------------------------|--------------------------|---------------|------------|
| mcr1-F | ATCAGCCAAACCTATCCCATCG         | <i>mcr-1</i>             | 1257          | [55]       |
| mcr1-R | GCAGACGCACAGCAATGCCTAT         |                          |               |            |
| mcr2-F | GCGATGGCGGTCTATCCTGTAT         | <i>mcr-2</i>             | 378           | [55]       |
| mcr2-R | TGCGATGACATGGGGTGTTCAGC        |                          |               |            |
| mcr3-F | TATGGGTTACTATTGCTGG            | <i>mcr-3</i>             | 814           | [55]       |
| mcr3-R | CTACCCTGATGCTCATCG             |                          |               |            |
| mcr4-F | GTCATAGTGGTATAAAAGTACAG        | <i>mcr-4</i>             | 669           | [55]       |
| mcr4-R | CCACCGTCTATCAGAGCCAAC          |                          |               |            |
| mcr5-F | GCGGTTGTCTGCATTTATCAC          | <i>mcr-5</i>             | 1042          | [55]       |
| mcr5-R | CTTTGAAAACCTGTCTTCGGCA         |                          |               |            |
| mcr6-F | GTCCGGTCAATCCCTATCTGT          | <i>mcr-6</i>             | 556           | [55]       |
| mcr6-R | ATCACGGGATTGACATAGCTAC         |                          |               |            |
| mcr7-F | TGCTCAAGCCCTTCTTTTCGT          | <i>mcr-7</i>             | 892           | [55]       |
| mcr7-R | TTCATCTGCGCCACCTCGT            |                          |               |            |
| mcr8-F | AACCGCCAGAGCACAGAATT           | <i>mcr-8</i>             | 667           | [55]       |
| mcr8-R | TTCCCCCAGCGATTCTCCAT           |                          |               |            |
| KPC-F  | CGTCTAGTTCTGCTGTCTTG           | <i>bla<sub>KPC</sub></i> | 798           | [56]       |
| KPC-R  | CTTGTCATCCTTGTTAGGCG           |                          |               |            |
| NDM-F  | GGTTTGGCGATCTGGTTTTC           | <i>bla<sub>NDM</sub></i> | 621           | [56]       |
| NDM-R  | CGGAATGGCTCATCACGATC           |                          |               |            |

|          |                           |                              |     |      |
|----------|---------------------------|------------------------------|-----|------|
| OXA48-F  | GCGTGGTTAAGGATGAACAC      | <i>bla</i> <sub>OXA-48</sub> | 438 | [56] |
| OXA48-R  | CATCAAGTTCAACCCAACCG      |                              |     |      |
| IMP-F    | GGAATAGAGTGGCTTAAYTCTC    | <i>bla</i> <sub>IMP</sub>    | 232 | [56] |
| IMP-R    | GGTTTAAYAAAACAACCACC      |                              |     |      |
| VIM-F    | GATGGTGTTTGGTCGCATA       | <i>bla</i> <sub>VIM</sub>    | 390 | [56] |
| VIM-R    | CGAATGCGCAGCACCAG         |                              |     |      |
| iucA-F   | GCTTATTTCTCCCAACCC        | <i>iucA</i>                  | 583 | [18] |
| iucA-R   | TCAGCCCTTTAGCGACAAG       |                              |     |      |
| iroB-F   | CAAAAAAGCAGCAGAGGC        | <i>iroB</i>                  | 585 | [18] |
| iroB-R   | TCACTGGCGGAATCCAACAC      |                              |     |      |
| peg344-F | AAAGGACAGAAAGCCAGTG       | <i>peg-344</i>               | 411 | [18] |
| peg344-R | CAATGACGAGGGGGATAATC      |                              |     |      |
| rmpA-F   | GAGTAGTTAATAAATCAATAGCAAT | <i>p</i> <i>rmpA</i>         | 332 | [18] |
| rmpA-R   | CAGTAGGCATTGCAGCA         |                              |     |      |
| rmpA2-F  | GTGCAATAAGGATGTTACATTA    | <i>p</i> <i>rmpA2</i>        | 430 | [18] |
| rmpA2-R  | GGATGCCCTCCTCCTG          |                              |     |      |

F, sense primer; R, antisense primer.
