# Supplementary material for: Molecular Characteristics and Quantitative Proteomic Analysis of Klebsiella pneumoniae Strains with Carbapenem and Colistin Resistance
Source: MDPI journal article supplement (doi:10.3390/antibiotics11101341), 2022-09-30
Supplement: s1 [file s1]

**Table S11: TMT labeling information of the DS, MDR and XDR strains.**

| <b>Group</b> | <b>Sample</b> | <b>TMT isotope</b> |
|--------------|---------------|--------------------|
| DS           | DS1           | 126                |
|              | DS2           | 127N               |
|              | DS3           | 127C               |
| MDR          | MDR1          | 128N               |
|              | MDR2          | 128C               |
|              | MDR3          | 129N               |
| XDR          | XDR1          | 129C               |
|              | XDR2          | 130N               |
|              | XDR3          | 130C               |
